# 1 A New Big-Data Paradigm for Target Identification and Drug Discovery

2  
3 Neel S. Madhukar\*<sup>1,2,3,4</sup>, Prashant K. Khade\*<sup>5</sup>, Linda Huang<sup>1,2,3</sup>, Kaitlyn Gayvert<sup>1,2,3,4</sup>, Giuseppe  
4 Galletti<sup>5</sup>, Martin Stogniew<sup>6</sup>, Joshua E. Allen<sup>6</sup>, Paraskevi Giannakakou<sup>3,5</sup>, Olivier Elemento<sup>1,2,3,4</sup>

5  
6 <sup>1</sup> Institute for Computational Biomedicine, Dept. of Physiology and Biophysics, Weill Cornell  
7 Medical College, New York, NY 10065, USA;

8 <sup>2</sup> Institute for Precision Medicine, Weill Cornell Medical College, New York, NY 10065, USA;

9 <sup>3</sup> Meyer Cancer Center, Weill Cornell Medical College, New York, NY 10065, USA;

10 <sup>4</sup> Tri-Institutional Training Program in Computational Biology and Medicine, New York, NY 10065,  
11 USA;

12 <sup>5</sup> Division of Hematology and Medical Oncology, Department of Medicine, Weill Cornell Medical  
13 College, New York, NY 10065, USA

14 <sup>6</sup> Oncoceutics, Inc., Philadelphia, PA 19104, USA

15  
16 \* co-first authors

17  
18 Correspondence: Joshua Allen ([josh.allen@oncoceutics.com](mailto:josh.allen@oncoceutics.com)), Paraskevi Giannakakou  
19 ([pag2015@med.cornell.edu](mailto:pag2015@med.cornell.edu)), or Olivier Elemento ([ole2001@med.cornell.edu](mailto:ole2001@med.cornell.edu))

## 20 21 Abstract

22  
23 Drug target identification is one of the most important aspects of pre-clinical development yet it is  
24 also among the most complex, labor-intensive, and costly. This represents a major issue, as lack  
25 of proper target identification can be detrimental in determining the clinical application of a  
26 bioactive small molecule. To improve target identification, we developed BANDIT, a novel  
27 paradigm that integrates multiple data types within a Bayesian machine-learning framework to  
28 predict the targets and mechanisms for small molecules with unprecedented accuracy and  
29 versatility. Using only public data BANDIT achieved an accuracy of approximately 90% over 2000  
30 different small molecules – substantially better than any other published target identification  
31 platform. We applied BANDIT to a library of small molecules with no known targets and generated  
32 ~4,000 novel molecule-target predictions. From this set we identified and experimentally validated  
33 a set of novel microtubule inhibitors, including three with activity on cancer cells resistant to  
34 clinically used anti-microtubule therapies. We next applied BANDIT to ONC201 – an active anti-  
35 cancer small molecule in clinical development – whose target has remained elusive since its  
36 discovery in 2009. BANDIT identified dopamine receptor 2 as the unexpected target of ONC201,  
37 a prediction that we experimentally validated. Not only does this open the door for clinical trials  
38 focused on target-based selection of patient populations, but it also represents a novel way to  
39 target GPCRs in cancer. Additionally, BANDIT identified previously undocumented connections  
40 between approved drugs with disparate indications, shedding light onto previously unexplained  
41 clinical observations and suggesting new uses of marketed drugs. Overall, BANDIT represents an  
42 efficient and highly accurate platform that can be used as a resource to accelerate drug discovery  
43 and direct the clinical application of small molecule therapeutics with improved precision.

## 44 45 Introduction

46  
47 It typically takes 15 years and 2.6 billion dollars to go from a small molecule in the lab to an  
48 approved drug<sup>1-3</sup>, and for natural products and phenotypic screen derived small molecules, one  
49 of the greatest bottlenecks is identifying the targets of any candidate molecules<sup>2,4</sup>. Proper  
50 understanding of binding targets can position drugs for ideal indications and patients, allow for  
51 better analog design, and explain observed adverse events. There exist a number of  
52 experimental approaches for target identification ranging from affinity pull-downs to genome-wide  
53 knockdown screens<sup>4,5</sup>, but these approaches are labor, resource, and time intensive, not to

54 mention failure prone. Computational target prediction has the potential to substantially reduce  
55 the work and resources needed for drug target identification. Existing computational methods  
56 traditionally fall into three major categories: ligand-based, molecular docking, and data driven.  
57 Ligand-based approaches take known binding targets for a given drug and attempt to find other  
58 proteins that are sufficiently similar to the known targets<sup>6,7</sup>. These similar proteins are then  
59 predicted as novel targets. However, to achieve high predictive power they require a large input of  
60 known binding partners for each tested drug, and therefore can only be used on drugs which  
61 have prior comprehensive target information<sup>6,7</sup>. Because of this, these methods are often not  
62 broadly applicable, especially to orphan molecules – molecules with no known binding targets.  
63 On the other hand, molecular docking uses simulations of small molecules interacting with  
64 proteins to model if and how a drug may bind a given protein<sup>8,9</sup>. However, this approach requires  
65 significant computational power and complex 3D structures for each queried protein – data that is  
66 often unavailable.

67  
68 Traditionally, data-driven methods have focused on a single aspect out of a small molecule's  
69 activity in a biological system. Wang et al.<sup>10</sup> used post-treatment gene expression changes to  
70 predict drugs with shared targets<sup>11,12</sup>. Another method relied on side-effect similarity between  
71 drugs with known targets to predict new drug-protein interactions<sup>13</sup>. However, this method was  
72 restricted to the small subset of small molecules that had been clinically tested and had thorough  
73 side effect annotation. Though each of these methods represents a significant advancement in  
74 the field, they all suffer from either lack of accuracy or broad utility – evidenced either by an  
75 inability to reliably validate target predictions, or by their limited applicability to a small subset of  
76 all small molecules. This is not very surprising though, as past research has demonstrated that  
77 these individual datasets are noisy, thus, it is expected that reliance on any single data type will  
78 lead to low predictive power<sup>14-16</sup>.

79  
80 Additionally, other groups have shown how the combination of multiple types of data can improve  
81 the calculation of drug-drug similarities<sup>17</sup> and adverse event prediction<sup>18</sup>, yet, this type of  
82 combinatorial approach has not been fully explored for drug-target prediction. The few reported  
83 studies using combinatorial approaches for drug-target prediction, suffer from significant  
84 limitations that minimize their impact in the field. These limitations include the use of gene-based  
85 similarity features, a method inherently biased against the discovery of diverse types of targets  
86 (favoring instead, the discovery of genes of the same class as the known drug-targets), the small  
87 number of drugs used in the study (<500), or lack of experimental target validation<sup>19-21</sup>. To  
88 overcome these limitations, we introduce BANDIT, a novel drug-target prediction platform.  
89 BANDIT achieves unprecedented target-identification accuracy, without any reliance on gene-  
90 based similarities (making it broadly applicable to newly discovered compounds), uncovers novel  
91 targets for the treatment of cancer, and can be used to quickly pinpoint potential therapeutics with  
92 novel mechanisms of action to accelerate drug development.

## 93 94 **A novel combinatorial Big-Data Approach leads to a large increase in predictive power**

95  
96 In the age of “Big Data” there has been an explosion of techniques that permit genomic, chemical,  
97 clinical, and pharmacological measurements to characterize a small molecule's mechanism.  
98 Many such measurements are either already published or are reasonably straightforward to  
99 perform. We hypothesized that integrating the multiple, independent pieces of evidence provided  
100 by each data type into a cohesive prediction framework would dramatically improve target  
101 predictions. To test this hypothesis, we developed **BANDIT**: a **B**ayesian **A**nalysis to determine  
102 **D**rug **I**nteraction **T**argets. BANDIT integrates over 20,000,000 data points from six distinct data  
103 types – drug efficacies<sup>22</sup>, post-treatment transcriptional responses<sup>11,12</sup>, drug structures<sup>23,24</sup>,  
104 reported adverse effects<sup>25</sup>, bioassay results<sup>23,24</sup>, and known targets<sup>26,27</sup> – to predict drug-target  
105 interactions. This underlying database contains information on approximately 2,000 different

106 drugs with 1,670 different known targets and over 50,000 unique orphan compounds (compounds  
107 with no known targets).

108

109 For each data type we calculate a similarity score for all drug pairs with known targets. Since  
110 each dataset uses a distinct reporting metric, the similarity calculation was specific to the data  
111 type being considered (**Figure S1; Methods**). Previous approaches have argued that high  
112 similarity in one feature indicates high similarity in others, implying that only one or two data types  
113 are sufficient for target prediction since others can be inferred<sup>28</sup>. However, using our vastly  
114 expanded dataset, we found little overall correlation across different similarity scores (**Figure 1A;**  
115 **Figure S2**). These results suggest that each data type is measuring a distinct aspect of a  
116 molecule's activity and that individual features for a given drug cannot be extrapolated based on  
117 other data types. This shortcoming further supported our hypothesis that a novel approach that  
118 integrates independent data types could significantly improve target prediction accuracy.

119

120 We next separated drug pairs into those that shared at least one known target (>34,000 pairs)  
121 and pairs with no known shared targets (>1,250,000 pairs). We applied a Kolmogorov-Smirnov  
122 test to each similarity score and used the associated D statistic to calculate the degree a given  
123 data type could separate out drug pairs that shared targets (**Figure 1B**). We found that all  
124 features were able to significantly separate the two classes ( $P < 2e-16$ ), and structural similarity  
125 was found to be the most discriminative among all features evaluated ( $D_{\text{Structure}} = 0.39$ ).  
126 Additionally, we discovered that similarity across an unbiased set of bioassays and the relatively  
127 simple NCI-60 growth inhibition screen could strongly differentiate shared target drug pairs  
128 ( $D_{\text{Bioassay}} = 0.327$  &  $D_{\text{GI50}} = 331$ ), while, surprisingly<sup>10,13,29</sup>, transcriptional responses ( $D_{\text{TResponse}} =$   
129  $0.1$ ) and reported adverse effects ( $D_{\text{SideEffect}} = 0.14$ ) were much weaker differentiators. This  
130 information not only identifies the strengths of each data type, but will also allow researchers to  
131 efficiently prioritize experiments when faced with limited resources.

132

133 For every drug pair, BANDIT converts each individual similarity score into a distinct likelihood  
134 ratio. These individual likelihood ratios are then combined within a Naïve Bayes framework to  
135 obtain a total likelihood ratio (TLR) that is proportional to the odds of two drugs sharing a target  
136 given all available evidence (**Figure 1C; Methods**). We calculated TLRs for all possible drug  
137 pairs with known targets and the output was evaluated using 5-fold cross validation. We observed  
138 an Area Under the Receiver Operating Curve (AUROC) of 0.89 –higher than any competing  
139 approach<sup>13,28</sup>– demonstrating that BANDIT's integrative approach can accurately identify drugs  
140 that share targets. We recomputed the AUROC while varying the number of included data types  
141 and observed an overall increase in predictive power as we added new data types (**Figure 2A**).  
142 Furthermore we observed a steady increase in predictive power regardless of the addition order.  
143 This result verified the power of BANDIT's "Big Data" approach and demonstrated how separate  
144 information sources can be combined to yield predictions more powerful than those obtained from  
145 any individual source (**Figure S3**). This was confirmed using the KS test where we saw that the  
146 TLR output could better separate shared target drug pairs than any individual similarity score with  
147 a drastic increase in performance when focusing on drug pairs with all 5 data types ( $D_{\text{TLR}} = .69$ ,  
148 **Figure S4**). Furthermore, we observed that BANDIT's ratio of true to false positives continually  
149 increased as we raised the cutoff value, indicating that BANDIT's TLR output is a dynamic value  
150 that estimates the strength and confidence level of a specific prediction and can effectively pick  
151 out high quality shared-target predictions (**Figure 2B, Figure S5**).

152

### 153 **BANDIT can replicate the results of experimental screens and predict specific target** 154 **interactions**

155

156 We next investigated how we could use BANDIT to replicate results from published experimental  
157 screens. Peterson et al.<sup>30</sup> tested 178 known protein kinase inhibitors against a panel of 300  
158 different kinases and measured the level of inhibition (in terms of percent remaining kinase

159 activity) for each inhibitor-kinase pair. We examined all orphan molecules – molecules with no  
160 known targets – in both the Peterson kinase database and BANDIT's, and, used BANDIT to  
161 predict potential kinases targets for each orphan molecule (**Methods**). We observed that the  
162 kinase targets BANDIT predicted for each orphan molecule had higher levels of reported  
163 inhibition in the Peterson dataset than non-predictions ( $p < 1e-5$ ; **Figure S6**). This result supports  
164 using BANDIT to guide experimental screens while minimizing operational costs.

165  
166 Moving forward from shared-target predictions, we examined whether for a given drug BANDIT  
167 could be used to predict a specific binding target from our database of over 1,600 unique  
168 proteins. We hypothesized that if a protein appeared as a known target in a large number of  
169 shared target predictions, then it is likely a target for the tested orphan molecule. To test this  
170 hypothesis, we developed a “voting” algorithm to predict specific targets for each orphan small  
171 molecule by identifying any recurring targets (**Figure 2C, Methods**). We applied our voting  
172 method to all drugs in our database with known targets and demonstrated that as we required  
173 more stringent TLR values for a pair of drugs to be predicted to share a target, the accuracy level  
174 – measured by whether BANDIT correctly identified a known drug target – steadily increased  
175 (**Figure 2D**). The accuracy level eventually reached ~90%, demonstrating that BANDIT could be  
176 used to accurately identify specific targets for a diverse set of small molecules.

177  
178 We then used BANDIT to predict novel targets for 14,168 small molecules with no known targets  
179 or mechanisms of action in our database. We confidently predicted targets for 4,167 unique small  
180 molecules (30% of our original set), with predictions spanning over 560 distinct protein targets. By  
181 setting a higher TLR cutoff for predictions and requiring a higher number of “votes” for any  
182 predicted targets, we further narrowed this list to 720 high confidence target predictions. To date,  
183 this is the largest database of novel drug-target predictions (nearly double the number of drugs in  
184 DrugBank's drug-target database) and this list can be interrogated further to discover novel  
185 therapeutics and small molecules for a target of interest. Based on this success, we envisioned  
186 two main operating scenarios for BANDIT: 1) Using BANDIT in combination with the library of  
187 orphan small molecules to identify new small molecules targeting a specific protein and 2) to  
188 integrate BANDIT directly into the drug development pipeline to predict targets and guide  
189 experiments for drugs currently in development (**Figure 2E**).

## 191 **Discovery of Novel Microtubule-Targeting Compounds Capable of Overcoming Drug** 192 **Resistance**

193  
194 Beginning with the first operating scenario, we used BANDIT to identify novel ways to target  
195 microtubules. Anti-microtubule drugs make up one of the largest and most widely used classes of  
196 cancer chemotherapeutics, with tubulin being one of the most validated anticancer targets to date  
197 <sup>31-34</sup>. Interestingly, and unlike most classes of cancer chemotherapy drugs or targeted-therapies in  
198 oncology, microtubule inhibitors are further sub-categorized as microtubule-stabilizing (e.g.  
199 taxanes) and microtubule-depolymerizing drugs (e.g. vinca alkaloids). Each class shifts the  
200 cellular equilibrium that normally exists between soluble tubulin dimers and microtubule polymers,  
201 towards microtubules (taxanes) or soluble tubulin (vinca alkaloids). Despite the clinical success of  
202 the entire class of microtubule inhibitors, the development of drug resistance – which is the  
203 number one cause of cancer mortality in metastatic patients – along with the presence of toxic  
204 side effects limits their clinical applicability <sup>35</sup>. Hence, the discovery of novel microtubule-targeting  
205 small molecules could significantly improve cancer therapy by identifying compounds with activity  
206 on refractory tumors or compounds with less toxic side effects. To this aim, we further focused  
207 our list of high confidence orphan-target predictions to small molecules predicted to target  
208 microtubules. To see how our novel predictions related to known microtubule-targeting  
209 therapeutics, we created a network of all known and predicted anti-microtubule small molecules  
210 with edges representing a predicted shared target interaction (**Figure S7**). Interestingly we found  
211 that the 14 known microtubule-targeting agents tended to cluster together based on their distinct



212 mechanism of action. For instance, we observe Paclitaxel clustering with Cabazitaxel and  
213 Docetaxel – all known microtubule-stabilizing drugs – while Colchicine clustered with other known  
214 microtubule-destabilizing drugs such as Podophyllotoxin. This is especially exciting since it  
215 demonstrates the potential for BANDIT to be used not only to identify a specific target for an  
216 orphan molecule but to differentiate between different modes of action on the same target.

217  
218 From our list of top anti-microtubule drug predictions we obtained a set of 24 compounds with  
219 varying structures for experimental testing (**Methods, Table S1**). We chose the human breast  
220 cancer MDA-MB-231 cells for the validation experiments as microtubule-inhibitors (both  
221 stabilizing and destabilizing) are commonly used in the treatment of breast cancer patients. Cells  
222 were treated for 6 hours with 1 and 10  $\mu\text{M}$  of each small molecule, and the integrity of the  
223 microtubule cytoskeleton (assessed by confocal microscopy following tubulin  
224 immunofluorescence), was used as the bio-assay endpoint. Our results showed that 16 of the 24  
225 orphan small molecules exhibited significant effects on microtubules (**Figure 3A-F, Figure S8-**  
226 **13**), a much higher success rate (67%) than one would expect by chance ( $p < 2e-16$ , **Methods**).  
227 To more accurately quantify the extent of drug-target engagement, we employed a second  
228 biochemical assay quantifying the effect that each small molecule exerted on the equilibrium  
229 between microtubule polymers and soluble tubulin, following 6 hours of treatment (**Figure S14**).  
230 Our results confirmed and corroborated the microscopy results, further revealing that while  
231 several small molecules had maximal microtubule-inhibitory activity at the lowest dose (1 $\mu\text{M}$ )  
232 (**Figure 3C-F**), others exhibited a dose-dependent effect on microtubule depolymerization (e.g.  
233 compounds #12, #13), further establishing microtubules as their bona-fide target (**Figure 3G-I**).  
234 Taken together, these experiments confirmed the predicted targets and mechanism of action for  
235 the majority of the newly identified microtubule inhibitors. While further testing will be needed  
236 before these small molecules can be used clinically, these results do demonstrate BANDIT's  
237 target prediction accuracy and how it can be used on compound libraries to identify small  
238 molecules acting with a specific mode of action on specific targets, for further investigation.

239  
240 To inform future clinical development for these newly identified microtubule inhibitors, we next  
241 tested their activity against drug resistant models. Drug resistance remains one of the most  
242 challenging areas in clinical oncology, affecting both broad chemotherapy drugs and targeted-  
243 therapies. In the case of microtubule inhibitors, overcoming drug resistance is even more  
244 challenging as the mechanisms are often multifactorial. As previously demonstrated, BANDIT can  
245 accurately identify a set of structurally diverse small molecules that all bind a common target (in  
246 this case microtubules), therefore we next investigated whether any of our newly identified  
247 microtubule-depolymerizing small molecules could successfully act on tumors resistant to other  
248 known anti-microtubule drugs. Using the 1A9 human ovarian carcinoma cell line – which has  
249 previously been used successfully in selecting microtubule-inhibitor resistant clones and for high  
250 throughput small molecule screening,<sup>36-40</sup> – we created clones resistant to Eribulin mesylate, a  
251 microtubule depolymerizing drug that is FDA approved for the treatment of docetaxel-refractory  
252 breast cancer patients<sup>41,42</sup> (**Figure 4A**). Interestingly, recent clinical data demonstrated that fewer  
253 than 50% of breast cancer patients showed any detectable response after treatment with Eribulin,  
254 further highlighting the importance of finding new molecules that share the same validated target  
255 but are active against the large population of refractory patients<sup>43</sup>. Our results, using 72-hr  
256 cytotoxicity assays showed that the Eribulin-resistant 1A9 cells (1A9-ERB) were more than 7,000  
257 –fold more resistant to Eribulin than the parental cells and exhibited cross-resistance to all  
258 classes of clinically used microtubule-depolymerizing drugs (**Table S2**). To test whether the drug-  
259 resistance phenotype was due to impaired drug-target engagement, we treated parental and  
260 resistant cells for 6 hr only with 1 $\mu\text{M}$  of Eribulin or each of the FDA-approved depolymerizing  
261 drugs. Consistent with their drug resistance phenotypes, our results showed lack of drug-induced  
262 microtubule depolymerization in 1A9-ERB cells in contrast to the complete depolymerization  
263 observed in the microtubule network of drug-sensitive 1A9 parental cells (**Figure 4B-C, Figure**  
264 **S15-16**). These on-target drug efficacy results are in agreement with the lack of antitumor activity

265 revealed by the cytotoxicity data further highlighting the importance of discovering novel small  
266 molecules that could act on these refractory tumors. We tested the top 4 performing small  
267 molecules (#15, 16, 24, and 2) on the 1A9-ERB cells and found that 3 out of 4 compounds tested,  
268 were active against the 1A9-ERB cells and effectively depolymerized microtubules, as evidenced  
269 by the diffuse soluble tubulin staining following drug treatment (**Figures 4E-F, Figure S15-16**), in  
270 contrast to the fine and intricate microtubule network observed in untreated cells (**Figures 4E-A**).  
271 Compound No 15, which was the most active of the 4 compounds, was tested using cytotoxicity  
272 assays and was found to almost completely reverse drug-resistance from 7050-fold observed  
273 with Eribulin down to 4-fold (**Table S2**). While further *in vitro* and *in vivo* studies are required for  
274 the clinical development of these compounds, these results clearly demonstrate BANDIT's utility  
275 in identifying lead small molecules with potential activity against drug resistance tumor models  
276 without the labor-and cost-intensive physical screening of thousands of small molecules. Even  
277 though BANDIT is "trained" using a database of drugs with known targets and mechanisms, our  
278 results show that it can accurately identify small molecules with distinct modes of action from any  
279 known drugs in the training set. This also highlights how BANDIT can pinpoint small molecules  
280 from large compound libraries with unique mechanisms that could potentially act on drug resistant  
281 cells. Compounds such as these could represent the next generation of clinically developed drugs  
282 reducing the need for extensive medicinal chemistry and structure-activity studies, therefore,  
283 expediting drug development.

284

#### 285 **BANDIT Uncovers Selective Antagonism of DRD2 by Anti-Cancer Small Molecule ONC201**

286

287 Given BANDIT's demonstrated capability to accurately identify specific targets for orphan small  
288 molecules, we next investigated how we could integrate BANDIT directly into the drug  
289 development pipeline and test its ability to predict targets for small molecules with promising  
290 clinical activity but without a specific target. Therefore we applied BANDIT to ONC201– a small  
291 molecule discovered in a phenotypic screen for p53-independent inducers of TRAIL-mediated  
292 apoptosis – currently in multiple phase II clinical trials for select advanced cancers. Despite its  
293 promising preclinical and early clinical anticancer activity and its reported effects on a few  
294 signaling pathways, including Akt/ERK pathway<sup>44-46</sup>, a bona-fide target for this compound  
295 remains elusive.

296

297 To identify direct binding targets for ONC201, we used BANDIT to compute likelihood ratios  
298 between ONC201 and all drugs with known targets in BANDIT's database. BANDIT's top shared  
299 target prediction were between ONC201 and Oxiperomide and Thioridazine, both a dopaminergic  
300 antagonists previously used the treatment of dyskinesias and schizophrenia respectively<sup>47-50</sup>.  
301 Interestingly, our voting analysis indicated that the most likely targets of ONC201 were dopamine  
302 receptors – specifically DRD2 – and adrenergic receptor alpha (**Figure 5A**), both of which are  
303 members of the G-protein coupled receptor (GPCR) superfamily.

304

305 To test these predicted targets we performed in vitro profiling of GPCR activity using a  
306 heterologous reporter assay for arrestin recruitment, which is a hallmark of GPCR activation<sup>51</sup>.  
307 Our results indicated that ONC201 selectively antagonized the D2-like (DRD2/3/4L), but not D1-  
308 like (DRD1/5L), subfamily of dopamine receptors (**Figure 5B; Figure S17A**), with no observed  
309 antagonism of other GPCRs under the evaluated conditions. Among the DRD2 family, ONC201  
310 antagonized both short and long isoforms of DRD2 and DRD3, with weaker potency for DRD4.  
311 Further characterization of ONC201-mediated antagonism of arrestin recruitment to DRD2L was  
312 assessed by a Gaddam/Schild EC50 shift analysis, which determined a dissociation constant of  
313 2.9  $\mu$ M for ONC201 that is equivalent to its effective dose in many human cancer cells (**Figure**  
314 **5C**). Confirmatory results were obtained for cAMP modulation in response to ONC201, which is  
315 another measure of DRD2L activation (**Figure 5D**). The ability of dopamine to completely reverse  
316 the dose-dependent antagonism of up to 100 $\mu$ M ONC201 suggests direct, competitive  
317 antagonism of DRD2L (**Figure S17B-C**). In agreement with the specificity of ONC201 for the

318 target predicted by BANDIT, no significant interactions were identified between ONC201 and  
319 nuclear hormone receptors, the kinome, or other drug targets of FDA-approved cancer therapies  
320 (**Figure S17D-E**; data not shown). Interestingly, a biologically inactive constitutional isomer of  
321 ONC201<sup>52</sup>) did not inhibit DRD2L, suggesting that antagonism of this receptor could be linked to  
322 its biological activity (**Figure S17F**). In summary, these studies establish that ONC201 selectively  
323 antagonizes the D2-like subfamily of dopamine receptors, which is an “unconventional” target for  
324 oncology drugs and further demonstrate BANDIT’s ability to act as a tool to advance drug  
325 development.

326  
327 This unexpected discovery on the DRD2L being a direct-binding target for ONC201, has also led  
328 to the design and launch of a clinical trial of ONC201 in pheochromocytomas, owing to high levels  
329 of DRD2L expression in this rare tumor type. Taken together, these results demonstrate the  
330 extreme potential of BANDIT to expedite drug development by using global, novel drug-target  
331 engagement predictions in combination with gene expression studies to enable the identification  
332 of select patient and indications groups more likely to benefit from a particular drug treatment.

### 333 334 **BANDIT can determine drug mechanisms and can help understand the drug “universe”**

335  
336 Following validation that BANDIT could accurately determine the specific targets for small  
337 molecules, we then examined how it could also be used to understand the target binding  
338 mechanism, otherwise known as its mechanism of action (MoA). First we used BANDIT to test all  
339 known microtubule-targeting drugs, and created a hierarchical cluster based on their TLR outputs  
340 (**Methods**). We observed a clean separation between drugs known to destabilize microtubule  
341 depolymerizing and polymerizing agents (**Figure 6A**). A similar MoA-based clustering was  
342 observed when we tested all known protein kinase inhibitors, which showed a clear separation  
343 between receptor tyrosine kinase inhibitors, serine/threonine kinase inhibitors, and nucleoside  
344 analogs (**Figure 6B**). Overall these results demonstrate that BANDIT can be used to differentiate  
345 small molecules based on their specific MoA without additional model training. Combined with the  
346 earlier voting algorithm, this demonstrates an efficient pipeline for small molecule target and  
347 mechanism identification: first using BANDIT to predict targets for an orphan small molecule,  
348 followed by clustering with other drugs known to act on the same target to discern MoA.

349  
350 We next used BANDIT to get an overview of how different classes of drugs, spanning the entire  
351 clinical landscape, may be related to one another. Based on the TLR between each drug pair, we  
352 constructed a network representative of the drug “universe,” or all known drugs with at least one  
353 predicted shared target interaction (**Figure 6C**). Each drug was classified according to its 1<sup>st</sup>  
354 order Anatomical Therapeutic Chemical (ATC) classification – characteristic of the type and  
355 intended use of each drug. As expected, drugs of a similar ATC code cluster together, however  
356 we also observed many “unexpected” clusters indicative of drug mechanisms or effect.  
357 Interestingly, among all classes of cancer chemotherapeutics, microtubule inhibitors clustered  
358 together with camptothecin analogues, for which a dual role as topoisomerase I and tubulin  
359 polymerization inhibitors has been previously reported<sup>53</sup>, but which is not widely acknowledged in  
360 clinical oncology. Conversely, we unexpectedly found opioids closely interconnected with  
361 microtubule targeting agents; this unanticipated observation is in line with previous reports  
362 showing how exposure to microtubule targeting drugs can increase the levels of the opioid  
363 receptor in rat cerebellums and that treatment of cardiac myocytes with opioids induces  
364 microtubule alterations<sup>54,55</sup>. This unexploited finding could reveal novel biology linking the opioid  
365 receptor signaling pathway with the microtubule cytoskeleton, as well as potentially represent an  
366 example of drug repurposing, suggesting novel clinical indications for drugs already FDA-  
367 approved. As further proof of the clinical value of the broad universe clustering information  
368 revealed by BANDIT, we detected close clustering of known beta-blockers with many Parkinson’s  
369 medications, which was especially interesting given that one of the most controversial clinical  
370 applications of beta-blockers was to reduce tremors in Parkinson’s patients<sup>56</sup>. Drug clustering

371 was also strongly indicative of potential side effects, as suggested by the link between  
372 antiretroviral medications, which often cause metabolic side effects like hypercholesterolemia,  
373 and statins, FDA-approved cholesterol lowering drugs<sup>57</sup>. Overall we believe this broad universe  
374 clustering approach could greatly advance future drug development by “indicating” novel  
375 potentially synergistic drug combinations, potentially cumulative side effects, and by assisting in  
376 drug repositioning.

377

## 378 Discussion

379

380 One of the strengths of the Bayesian framework is that it can easily accommodate new features,  
381 and, as we have observed, we expect that the addition of new data to only improve the overall  
382 performance. In addition, as more information becomes available there are many aspects of the  
383 current implementation that can be improved. For instance, we can better understand the  
384 dependencies between distinct data types and model those within our Bayesian network, and as  
385 more information on binding kinetics becomes available, BANDIT could be adapted to better  
386 predict on versus off-target effects. As drug development often stops in early clinical studies due  
387 to “unanticipated” toxic side effects, BANDIT could help overcome these roadblocks by identifying  
388 side effects due to unknown off-target bindings.

389

390 In summary, we have developed BANDIT, an integrative Big-Data approach that combines a set  
391 of individually weak features into a single reliable and robust predictor of shared-target drug  
392 relationships. Not dependent on complex 3D models or large known target cohorts, BANDIT can  
393 be used to predict shared target drugs and mechanisms of action for any drug or small molecule  
394 (over 50,000 in our database) which differentiates it from other target prediction approaches. By  
395 using the top shared-target predictions we can further predict with high accuracy specific targets  
396 for a given small molecule and demonstrate how BANDIT can be used to both efficiently discover  
397 new drugs with novel mechanisms for specific targets and identify targets for small molecules in  
398 the development pipeline – all without tedious, labor-intensive and inaccurate drug screening  
399 approaches.

400

401 Our BANDIT predictions replicated shared-target relationships, individual drug-target  
402 relationships, and known mechanisms of action within our test set and replicated results of large-  
403 scale experimental screens. Moreover, we experimentally confirmed several of our novel  
404 predictions using different bioassays and model systems and demonstrated BANDIT’s capability  
405 to efficiently discover novel small molecules, which could be used in refractory tumors. As the  
406 development of drug resistance is inevitable in oncology and applicable to both chemotherapy  
407 and targeted therapies, BANDIT has the potential to quickly and accurately identify drugs that can  
408 potentially overcome resistance and improve patient outcomes. Finally, BANDIT can be used on  
409 a broader scale to discern mechanisms of approved drugs, characterize the global drug universe  
410 landscape, and explain existing, yet puzzling, clinical phenotypes. That function alone holds  
411 tremendous potential for drug repurposing, identification of novel drug combinations, and side  
412 effect predictions.

413

414 We show herein the potential of BANDIT in expediting drug development, as it spans the entire  
415 space ranging from new target-identification and validation to clinical drug development and  
416 beyond, by informing repurposing efforts. We expect that BANDIT will help reduce failure rates in  
417 the clinic and shorten the time required for drug approval by identifying the right patient population  
418 most likely to benefit from a given therapeutic. By allowing researchers to quickly obtain target  
419 predictions it could streamline all subsequent drug development efforts and save both time and  
420 resources. Furthermore BANDIT could be used to rapidly screen a large database of compounds  
421 and efficiently identify any promising therapeutics that could be further evaluated. Overall our  
422 results demonstrate that BANDIT is a novel and effective screening and target-prediction platform  
423 for drug development and is poised to positively impact current efforts.



424

## Methods

425

### Datasets:

426

1. Growth inhibition data: We used publicly available growth inhibition data from the National Cancer Institutes Development Therapeutics Program (NCI-DTP). Each of the NCI60 cell lines were treated with a small molecule and the concentration that caused a 50% decrease in cells was measured. When there were multiple high quality experiments done for the same compound, we averaged the values to obtain a single GI50 value for each small molecule – cell line pair. Contains data on 20,000+ unique compounds. Version 1.6.2 was downloaded from cellminer.com.

433

2. Gene expression data: All post-treatment gene expression data was downloaded from the Broad Connectivity Map (CMap) project. Fold change data across all cell lines were averaged to obtain a single gene expression signature for each compound. Contains data on 1309 different compounds. Build 02 was downloaded from the Broad CMap Portal.

434

435

436

437

438

439

3. Adverse effects: Side effects (mined from drug package inserts and public information) were downloaded from the SIDER database. Each side effect was classified using the MedDRA (version 16.1) dictionary.

440

441

442

443

444

445

4. Bioassays/Chemical structures: All bioassay results and chemical structures were downloaded from PubChem and organized based on each small molecule's PubChem Compound Identification (CID).

5. Known Drug Targets: All known drug targets were extracted from the DrugBank database (Version 4.1).

446

### Calculating similarity scores:

447

1. Growth Inhibition Data: For each pair of drugs we calculated a pearson correlation value across the 60 data points (Figure S1).

448

449

2. Gene expression and Chemogenomic Fitness Scores: A pearson correlation was used to measure the degree of similarity for the profiles of two drugs

450

451

452

453

454

3. Bioassays: All bioassays were classified as either positive or negative based on the data available in Pubchem. A jaccard index was calculated based on the number of shared "positive" assays between two drugs. We required that each drug pair have been tested in at least one similar assay for a similarity score to be calculated.

455

456

457

4. Chemical Structures: For each drug we extracted the isomeric SMILES and used the atom-pair method<sup>58</sup> to calculate the structural similarity between two compounds (Figure S1).

458

459

460

461

5. Adverse Effects: Using the SIDER2 database<sup>25</sup> we extracted the "preferred term" side effects for each drug. A jaccard index was then calculated for the shared side effects for each drug pair.

462

### Calculating correlations between similarity types:

463

464

465

466

467

468

469

470

471

For each pair of similarity scores we separated out drug pairs where both similarity types were measured and plotted the different similarity scores against one another (Figure 1a, Figure S2). We computed the Pearson correlation coefficient (PCC) and the coefficient of determination ( $R^2$ ) between each pair of similarity scores. Across all pairs, we observed a low correlation – measured by both the PCC and  $R^2$ . This finding demonstrated that high similarity of one type does not necessarily implied high similarity in another. Furthermore this indicated that each similarity score could be modeled as an independent variable.

472

### Calculating the Total Likelihood Ratio:

473

474

475

476

For each data type BANDIT calculates a "likelihood ratio"  $L(s_n)$  is defined as the fraction of drug pairs with a shared target (ST pairs) having a given similarity score  $s_n$ , divided by the fraction of the non-ST pairs with the same similarity score:

477  
478

Eq. 1:

$$L(s_i) = \frac{\Pr(s_i|ST)}{\Pr(s_i|non-ST)}$$

479  
480

481 Our previous analysis highlighted the minimal correlation between the similarity types and how  
482 data types could be modeled independently under a Naïve Bayes framework. This assumption of  
483 independence implies that the joint probability of two drugs sharing a target given a set of  
484 similarity scores can be modeled as the product involving individual similarity scores. Therefore  
485 the total likelihood ratio  $L(s)$  can be expressed as the product of the individual likelihood ratios:

486  
487  
488

Eq. 2:

$$TLR = L(s) = \prod_n L(s_{1-n}) = L(s_1)L(s_2) \dots L(s_n)$$

$n = \text{maximum \# of included datasets}$

489  
490

491 The total likelihood ratio (TLR) is then proportional to the odds of two drugs sharing a given target  
492  $n$  given sources of information

493

494 Overall we decided to use this Bayesian framework for multiple reasons, such as the readily  
495 interpretable nature of a likelihood ratio compared to other more complicated machine learning  
496 scores and the ability to easily add in new data types as they become available.

497

#### 498 **Testing Against Drugs with Known Targets:**

499

500 Drug targets were extracted from DrugBank and drug pairs were classified as a “shared-target”  
501 pair if they had at least 1 target in common. We used 5-fold cross validation to split our set of drug  
502 pairs into a test and training set containing 20% and 80% of the drug pairs respectively. We sub-  
503 sampled the two classes (ST and non-ST drug pairs) and required the ratio of true positives (ST  
504 pairs) to true negatives (non-ST pairs) to remain the same as the total set. For each fold we  
505 computed TLRs for each drug pair in the test set based on the background probabilities within the  
506 training set. Each of the 5 test folds combined at the end to produce an ROC Curve and calculate  
507 the AUROC value. We calculated the AUROC value for each individual likelihood ratio from a  
508 single data type (Figure S3)

509

510 We performed this analysis with the TLR output while varying the number of data types being  
511 considered and found a significant increase in the predictive power, measured by the AUROC, as  
512 we increased the number of included datasets (Figure 2A). We computed two sets of ROC curves  
513 – one where we required drugs have available data in each included data type (our preferred  
514 method) and another where we imputed the data type median for each missing data type. We  
515 varied the order in which datasets were added and observed a positive relationship between  
516 AUROC value and the number of included data types regardless of the addition order.  
517 Furthermore we used a KS test to measure how our TLR value could separate out ST and non-  
518 ST pairs and saw that in each case our TLR value outperformed any individual variable (Figure  
519 S4). We repeated this analysis increasing the minimum number of data types we required a pair  
520 of compounds to have and saw the separation steadily improve ( $D = .44$  to  $.69$ ).

521

#### 522 **Replicating Kinase Experimental Screen**

523

524 We first separated out the kinases in the Peterson et al. database that were classified as BANDIT

525 orphan small molecules – molecules that were in at least two of the considered BANDIT  
526 databases and had no known targets. For each orphan kinase inhibitor we used BANDIT to  
527 predict shared target drugs. Each known kinase target of the shared target drugs was classified  
528 as a potential kinase target of the orphan inhibitor. We then observed that the “percent remaining  
529 kinase activity” was significantly lower between the orphan kinase inhibitors and the BANDIT  
530 predicted kinases than between the orphan inhibitors and any non-predicted kinases (Wilcoxon  
531 Rank Sum Test  $P = 3.62e-06$ ) (Figure S6).

### 532 **Specific Target Voting**

533  
534 For each orphan small molecule we identified all shared target drug predictions, or any drugs with  
535 known targets that exceeded a given BANDIT likelihood ratio. For each shared target drug  
536 prediction, we compiled all known targets of that given drug and ranked specific protein targets  
537 based on how often it appeared as known target in shared drug target predictions. “Votes” for  
538 particular protein targets were weighted based on the likelihood ratio of the shared target  
539 prediction they originated from. The top voted target for each orphan small molecule that we  
540 tested was then predicted to be a novel specific target (Figure 2e).

541  
542 To test the accuracy, we used leave-one-out cross validation on our test set of drugs with known  
543 targets. For each drug we used BANDIT to compare it to all other drugs with known targets and  
544 identify the top ranked target for the tested drug. This was repeated for every drug in our test set  
545 and we calculated how often the top ranked target was a known target of the drug being tested.  
546 We recomputed these accuracies while varying the likelihood ratio cutoff for a drug pair to be  
547 considered a shared-target prediction. As expected we observed a steady rise in accuracy as we  
548 increased the cutoff value, with the accuracy plateauing at an accuracy level of approximately  
549 90% – revealing that BANDIT’s voting protocol could accurately identify specific targets (Figure  
550 2F).

### 551 552 **Identification of Novel Anti-Microtubule Small Molecules**

553  
554 For each orphan small molecule in BANDIT (defined as a molecule tested in any of the individual  
555 databases but without any known targets in DrugBank) we used the BANDIT voting protocol to  
556 predict specific protein targets. We required that each orphan small molecule be in at least 3 of  
557 BANDIT’s databases, leaving us with a set of ~15,000 small molecules. To refine our initial list of  
558 predictions into a high confidence set, we required a TLR cutoff of 500, that each predicted target  
559 appear in the majority of shared target predictions, and that the highest ranked target appear in  
560 the top shared target prediction for each orphan molecule. From this list of high confidence  
561 predictions we identified a set of small molecules predicted to bind to microtubules.

562  
563 For each predicted microtubule inhibitor (MTI) we examined how it related to known MTIs using a  
564 network approach (Figure S7). We required that each predicted MTI have a TLR greater than 500  
565 with at least two known MTIs. Each edge in our network represents a predicted shared target  
566 interaction with the length and width of each corresponding to the strength of the prediction  
567 (measured by the TLR value). We used the Fruchterman Reingold projection within the R igraph  
568 package. We observed a distinct clustering of known MTIs based on their mechanism of action.

569  
570 Most of the novel MTIs we predicted were not easily obtained, thus we specifically focused on the  
571 subset that we could obtain from the National Cancer Institutes Developmental Therapeutics  
572 Program (Table S1).

### 573 574 **Microtubule Imaging/Testing**

575

576 Human breast MDA-MD-231 cells were cultured in DMEM (obtained from Corning Cellgro) with  
577 10% fetal bovine serum and 1% penicillin and streptomycin. Cells were plated at the density of  
578 90,000 Cells/ml onto 12mm round cover slips in 48 well plates for 24 hours and then treated for 6  
579 hours with small molecules at the given concentrations. Small molecules (obtained from the NCI  
580 Drug Bank) were dissolved in DMSO and stored at -20°C. Control experiments were done using  
581 DMSO and it was less than 0.5% of total media volume. After 6hrs drug treatment media was  
582 removed and cells were per-meabilized with 0.5% Triton X-100 and fixed with PHEMO Buffer  
583 (3.7% formaldehyde, 0.05% glutaraldehyde, 0.068M Pipes, 0.025M HEPES, 0.015M EGTANa<sub>2</sub>,  
584 0.003M MgCl<sub>2</sub>·6H<sub>2</sub>O and 10% DMSO and adjust pH=6.8) for 10minutes. Fixed cells were washed  
585 three times with PBS buffer. Cells were blocked with 10% goat serum at room temperature for 10  
586 minutes. Cells were incubated with monoclonal  $\alpha$ -tubulin antibody (clone YL 1/2, obtained from  
587 EMD Millipore), for 1hr and washed three times with PBS buffer before incubation with a  
588 secondary Alexa Fluor 488 goat anti-mouse antibody (obtained from Invitrogen). Cell chromatin  
589 was stained with DAPI for 5min and washed with water three times. Cover slips were mounted  
590 and photographed in a RSM 700 microscope for microtubule visualization. DNA was  
591 counterstained with DAPI. Images were acquired with Zeiss LSM 700 confocal microscope under  
592 a 63x/1.4NA objective (Zeiss, Germany) (Figure 3A-H, Figure S8-S13).  
593

594 A Fisher's exact test was used to determine whether the number of observed successes –  
595 defined as a predicted microtubule inhibitor showing an effect against microtubules in imaging –  
596 was greater than what would be expected by random chance. To determine the background  
597 probability we used the number of drugs with known targets in our database that were known to  
598 target microtubules (~ 1%).  
599

#### 600 **Microtubule Effect Quantification**

601  
602 Following 6hrs treatment, cells (12 well plate) were washed once with warm phosphate-buffered  
603 saline. Each well was incubated with 150  $\mu$ L either with low salts or high salt buffer at 37 °C for 10  
604 minutes. Cell were then scraped and were either lysed in low salt buffer to test for the degree of  
605 tubulin polymerization (20mM Tris-HCl pH 6.8, 1mM MgCl<sub>2</sub>, 2mM EGTA, 0.5% NP-40, 1X  
606 protease inhibitor cocktail and 0.5% NP-40) or high salt buffer to test for the degree of tubulin  
607 depolymerization (0.1M Pipes, 1mM EGTA, 1mM MgSO<sub>4</sub>, 30% glycerol, 5% DMSO, 1mM DTT,  
608 0.02% NAAzide, 0.125% NP-40, 1mM DTT and 1X protease inhibitor cocktail). Samples were  
609 spun at max speed in a tabletop centrifuge for 30 min at room temperature. The supernatant (S)  
610 was separated from the pellet (P). The pellet was resuspended in 150  $\mu$ L 1 x Laemmli buffer and  
611 sonicated. Equal volumes of supernatant and pellet samples were loaded onto a 12% gel for a  
612 western blot. Tubulin bands were visualized with a DM1 $\alpha$  monoclonal antibody (obtained from  
613 Sigma-Aldrich). % Tubulin in pellet levels were calculated as the densitometric value of the pellet  
614 band divided by the total densitometric value of the pellet and supernatant bands times 100.  
615 Three biological repeats were performed (Figure S14).  
616

#### 617 **Imaging of Treatment Against Resistant Cell Lines**

618  
619 1A9-ERB is a clone of the 1A9 human ovarian carcinoma cell line resistant to the effects of  
620 Eribulin mesylate. It was prepared by exposing 1A9 cells to 1ng/ml Eribulin (obtained from Eisai  
621 pharmaceuticals) in the presence of 10ug/ml verapamil (obtained from Acros Organics), a Pgp  
622 antagonist. The cells were maintained in the 0.5ng/ml eribulin and 10ug/ml verapamil  
623 concentrations. Cells were removed from this drug solution 3 days prior to any future  
624 experimentation. Additional treatment and imaging was done using the same protocols as  
625 described earlier (Figure S15-S17).  
626

#### 627 **Characterization of ONC201-DRD2 Interaction**

628



629 ONC201 dihydrochloride was obtained from Oncoceutics. Kinase inhibition assays for the kinome  
630 were performed as previously described<sup>59</sup>. GPCR arrestin recruitment and cAMP modulation  
631 reporter assays were performed as previously described<sup>60</sup>. PathHunter™ (DiscoverRx) beta-  
632 arrestin cells expressing one of several GPCR targets were plated onto 384-well white solid  
633 bottom assay plates (Corning 3570) at 5000 cells per well in a 20 μL volume in the appropriate  
634 cell plating reagent. Cells were incubated at 37 °C, 5% CO<sub>2</sub> for 18-24 h. Samples were prepared  
635 in buffer containing 0.05% fatty-acid free BSA (Sigma). For agonist mode tests, samples (5 μL)  
636 were added to pre-plated cells and incubated for 90 minutes at 37 °C, 5% CO<sub>2</sub>. For antagonist  
637 mode tests, samples (5 μL) were added to pre-plated cells and incubated for 30 minutes at 37 °C,  
638 5% CO<sub>2</sub> followed by addition of EC80 agonist (5 μL) for 90 minutes at 37 °C, 5% CO<sub>2</sub>. For Schild  
639 analysis, samples (5 μL) were added to pre-plated cells and incubated for 30 minutes at 37 °C,  
640 5% CO<sub>2</sub> followed by addition of serially diluted agonist (5 μL) for 90 minutes at 37 °C, 5% CO<sub>2</sub>.  
641 Control wells defining the maximal and minimal response for each assay mode were tested in  
642 parallel. Arrestin recruitment was measured by addition of 15 μL PathHunter Detection reagent  
643 and incubated for 1-2 h at room temperature and read on a Perkin Elmer Envision Plate Reader.  
644 For agonist and antagonist tests, data was normalized for percent efficacy using the appropriate  
645 controls and fitted to a sigmoidal dose-response (variable slope),  $Y = \text{Bottom} + (\text{Top} - \text{Bottom}) / (1 + 10^{((\text{LogEC50} - X) * \text{HillSlope}))}$ , where X is the log concentration of compound.  
646

647  
648 For Schild analysis, data was normalized for percent efficacy using the appropriate controls and  
649 fitted to a Gaddum/Schild EC50 shift using global fitting, where  $Y = \text{Bottom} + (\text{Top} - \text{Bottom}) / (1 + 10^{((\text{LogEC} - X) * \text{HillSlope}))}$ ,  
650  $\text{Antag} = 1 + (B / (10^{(-1 * pA2)}))^{SchildSlope}$  and  
651  $\text{LogEC} = \text{Log}(\text{EC50} * \text{Antag})$ . EC50 / IC50 analysis was performed in CBIS data analysis suite  
652 (Cheminnovation) and Schild analysis performed in GraphPad Prism 6.0.5 (Figure 5, Figure S17).  
653

654 The kinase assay and nuclear hormone receptor profiling (S16) were performed as previously  
655 described by Reaction Biology Corp and DiscoverX respectively<sup>61-63</sup>.  
656

### 657 **Drug Mechanism Clustering**

658  
659 For each drug pair we converted the TLR between them into a distance metric used to estimate  
660 “closeness” between any two drugs:  
661

662

$$\text{Eq. 3: } \text{BANDIT Distance Score} = \frac{1}{TLR}$$

663  
664 We next separated all drugs known to target microtubules that were in at least 3 of BANDIT’s  
665 dataset. With the BANDIT distance metric as an input we created a hierarchical cluster of all  
666 known MTIs using the hclust R method with an “average” based clustering method. Known MTIs  
667 were labeled based on whether they were known to polymerize or depolymerize microtubules,  
668 and we observed a distinct separation based on the mechanism of action (MoA). We repeated  
669 this clustering while removing drug structures from our likelihood calculations and continued to  
670 see a MoA-based separation (Figure S18). This revealed that BANDIT’s clustering approach is  
671 not dependent on any single data type, and that observed results are due to BANDIT’s integrative  
672 approach. This analysis was then repeated using similar conditions for known protein kinases.  
673

### 674 **Drug “Universe” Clustering**

675  
676 Using the same protocol as was used to create the MTI network, we created a network of all  
677 drugs with known targets with each edge representing a predicted shared target interaction and  
678 the edge weight corresponding to the strength of the interaction. Using the KEGG drug  
679 database<sup>64</sup> and DrugBank<sup>27</sup> we annotated each drug based on its most prevalent ATC code and  
680 colored each drug accordingly. We specifically isolated out 3 clusters representing: 1) beta-

681 blockers with Parkinson's medications, 2) antiretrovirals and statins and 3) opioids and  
682 microtubule inhibitors.

683

684 To get a better understanding of how orphan small molecules fit into this drug "universe" we  
685 computed the distance between every pair of small molecules and used multi-dimensional scaling  
686 to visualize the overall structure (Figure S19). We used the same distance metric as described in  
687 the mechanism of action clustering section to create a distance matrix between all small  
688 molecules (known drugs and orphan) and used the R cmdscale package for the multi-dimensional  
689 scaling. We noticed a definite structure with known drugs tightly clustering around each other,  
690 while orphan molecules had a more diffuse organization. One explanation for this structure is that  
691 drugs with known targets are more likely to be used to treat patients and thus may have similar  
692 effects due to safety precautions, whereas orphan molecules which have not gone through  
693 clinical trials and FDA approval are more likely to have a wide variety of effects and  
694 characteristics.

695

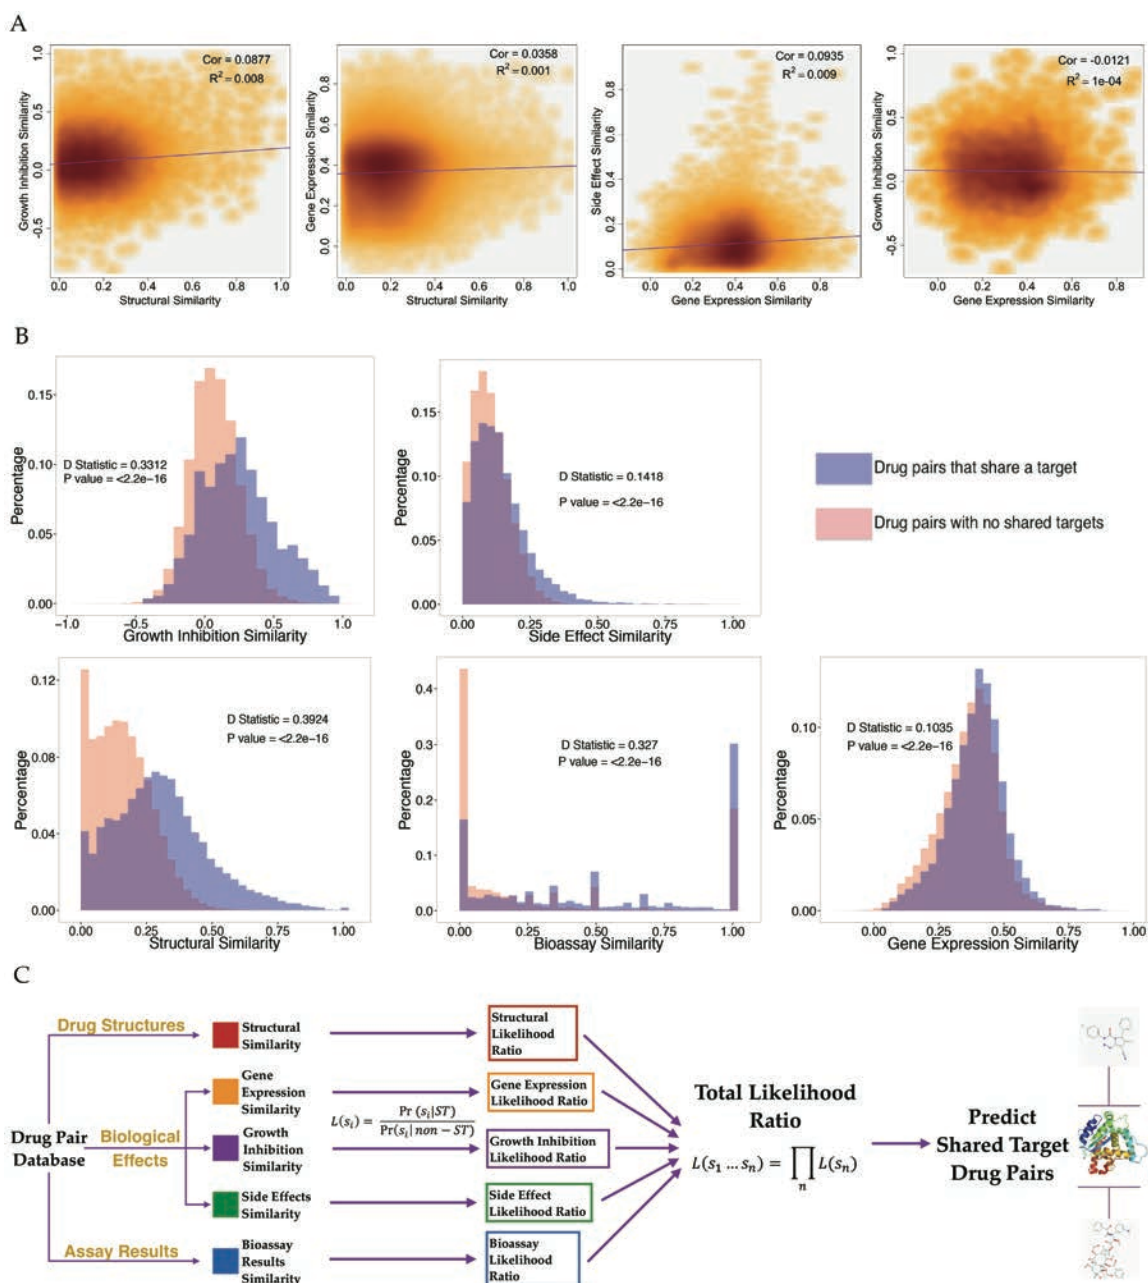

Figure 1

Figure 1: BANDIT exploits both the independence and individual predictive powers of each data type – A) Density plots showing how various different similarity scores correlate with one another, with darker area corresponding to a higher density of values.  $R^2$  and P value were calculated using a Pearson correlation. B) Distributions of similarity scores across two sets – drug pairs known to share a target and those with no known shared targets. P values and D statistics were calculated using the Kolmogorov-Smirnov test. C) Schematic of BANDIT's method of integrating multiple data types to predict shared target drug pairs.

696  
697  
698  
699  
700  
701  
702  
703  
704

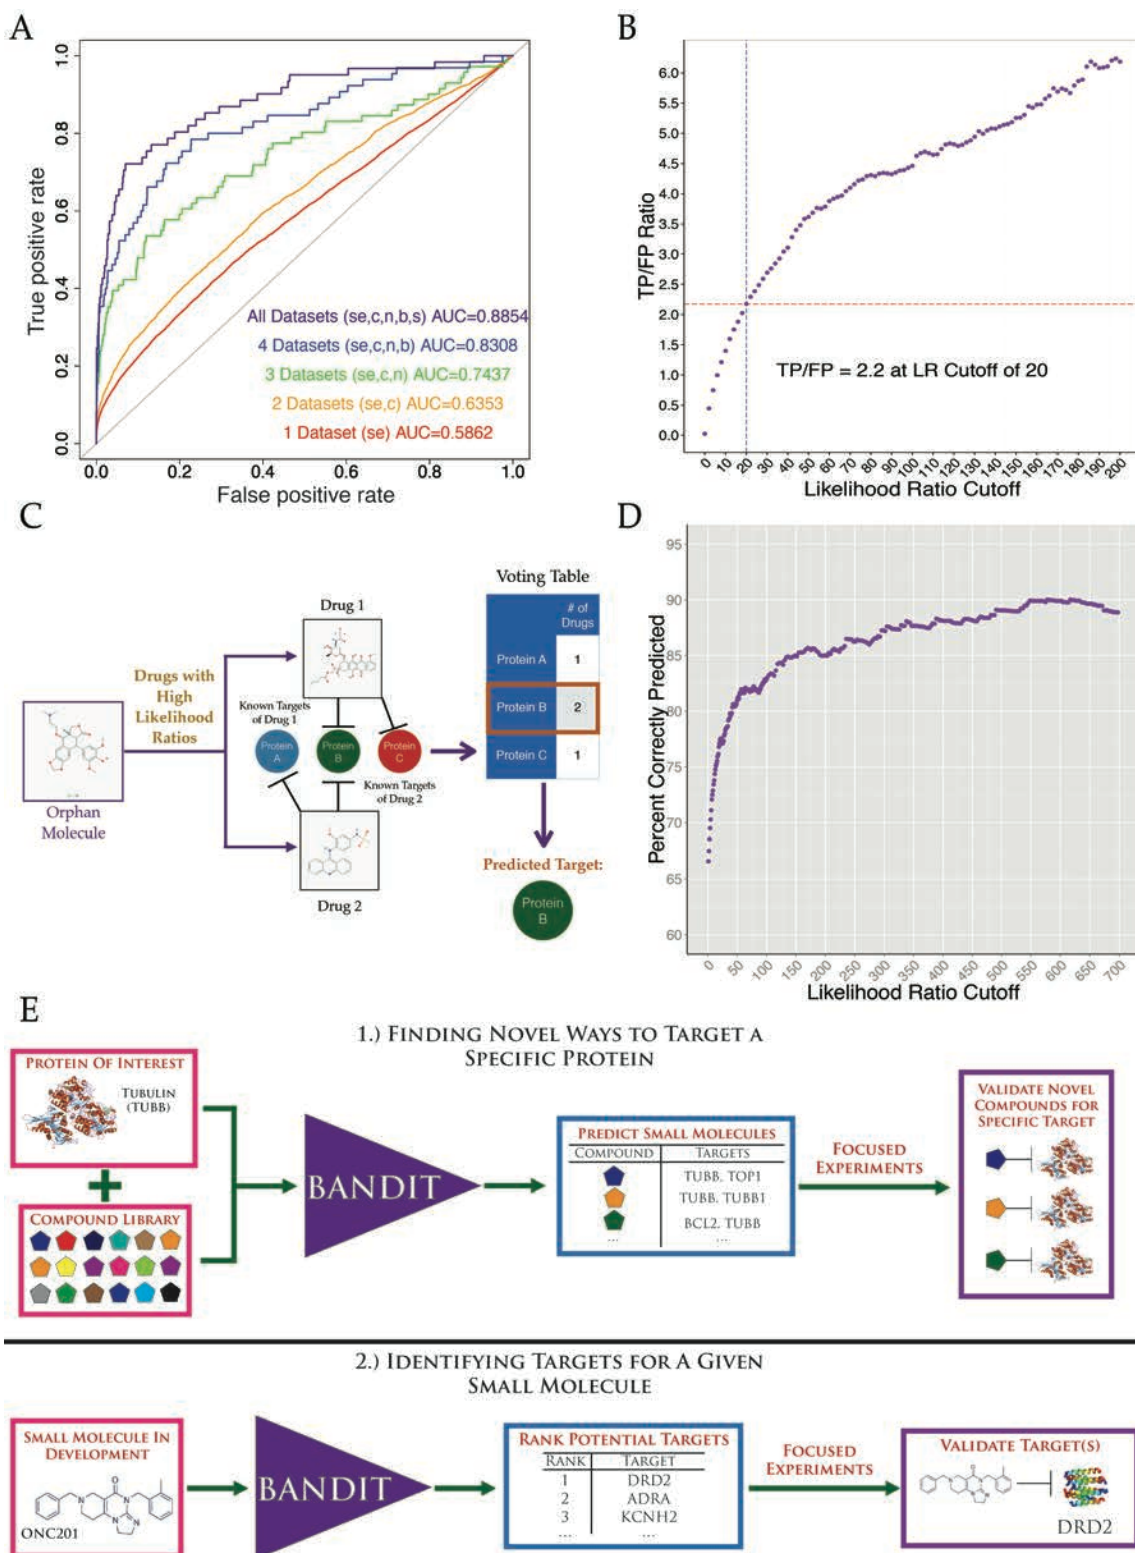

Figure 2

Figure 2: BANDIT can accurately predict shared targets and specific target interactions – A) Area under the receiver-operating curve for different sets of data types. SE = Side effects; C = CMap; N = NC160; B = Bioassays; S = Structure. B) Ratio of true positives to false positives at different

705  
706  
707  
708



709 likelihood ratio cutoffs. C) Schematic of the BANDIT voting schematic for predicting specific target  
710 interactions. D) Accuracy level of BANDIT's voting algorithm at various likelihood ratio cutoffs E)  
711 Schematic of two proposed operating scenarios for BANDIT

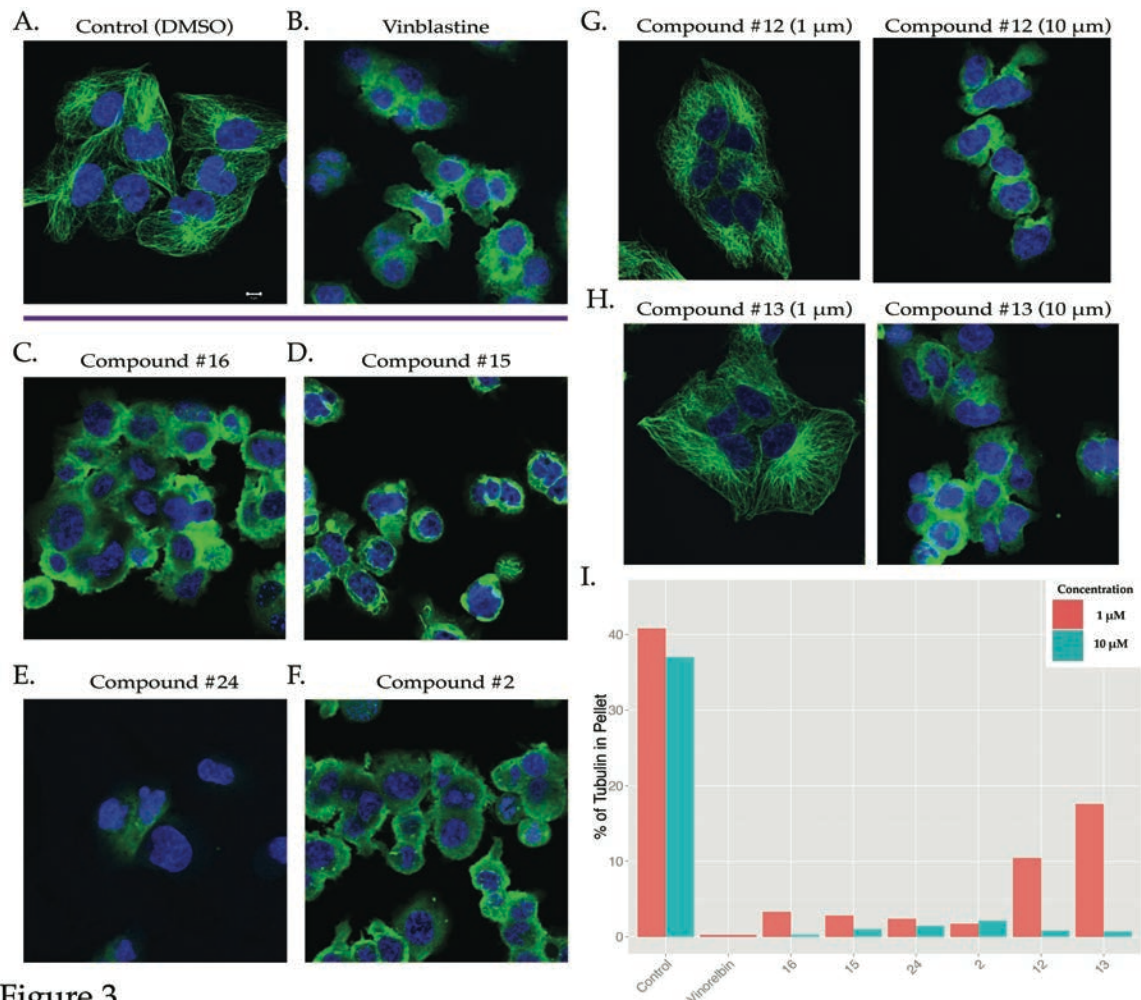

Figure 3

712  
713  
714  
715  
716  
717  
718  
719  
720  
721

Figure 3: Microtubules are a correct target of the newly identified small molecules – Effect of various compounds (1 $\mu$ M) on the microtubule integrity of MDA-MB-231 cells after 6 hours of treatment. A) Control with DMSO (Scale bar: 5  $\mu$ m), B) Vinblastine as a positive control, C) Compound #16, D) Compound #15, E) Compound #24 F) Compound #2. G) Dose dependent effect of Compound #12 and H) Compound #13. I) Bar graph showing the % tubulin in the pellet compared to the supernatant (averaged over three independent replicates) for depolymerizing drugs at 1 and 10  $\mu$ M.

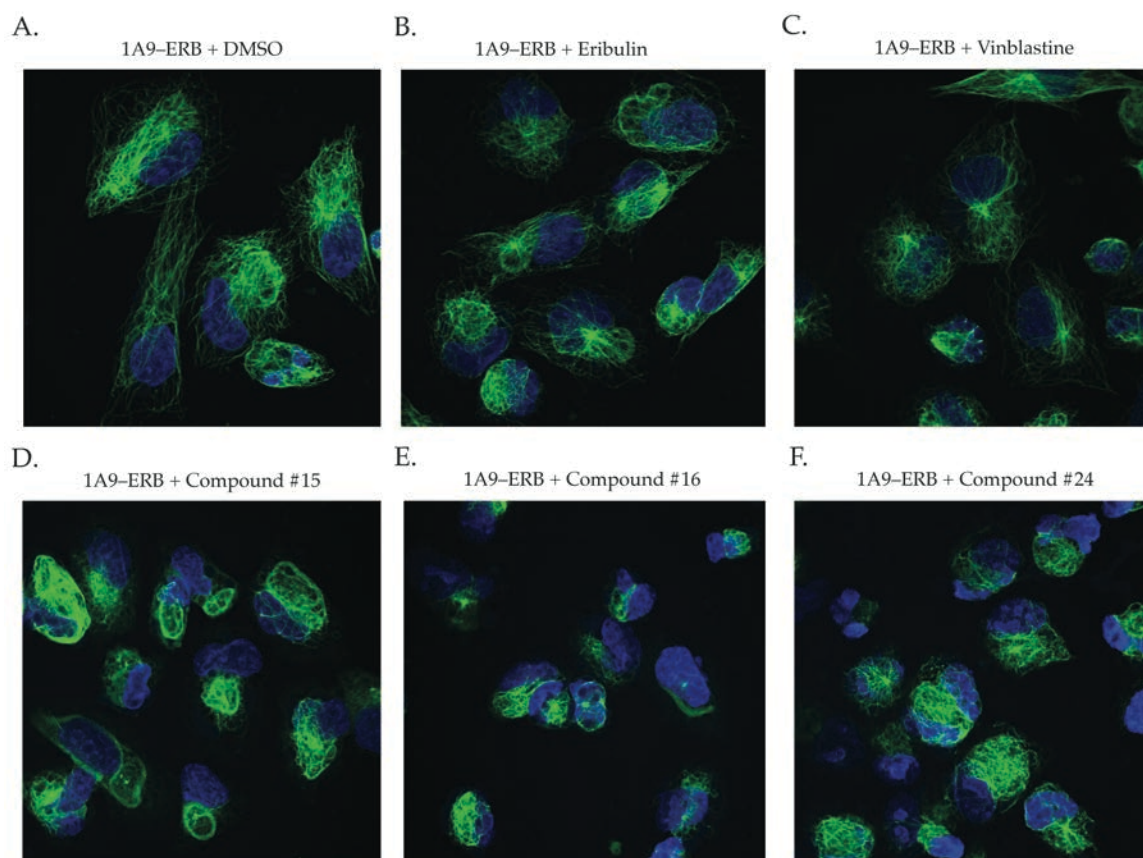

Figure 4

722  
723  
724  
725  
726  
727

Figure 4: A set of the BANDIT predicted small molecules can act on cells resistant to Eribulin and other microtubule depolymerizing drugs – Effect of various compounds on the microtubule integrity of 1A9-ERB cells after 6 hours of treatment: A) Control with DMSO (Scale bar: 5 µm), 100nM of B) Eribulin and C) Vinblastine, and 1µM of D) Compound #15, E) Compound #16 and F) Compound #24.

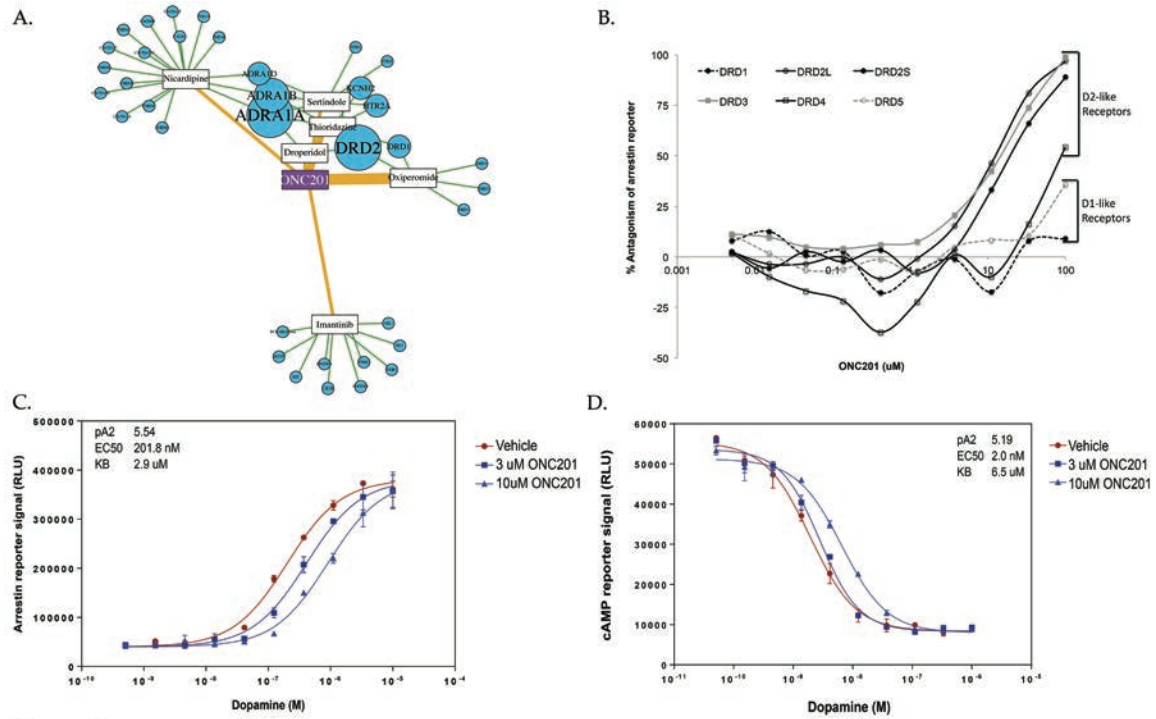

Figure 5

728  
729  
730  
731  
732  
733  
734  
735

Figure 5: ONC201 is a selective DRD2 antagonist – (A) BANDIT target predictions for ONC201. Connections between ONC201 and known drugs are weighted based on the likelihood ratio and predicted targets are sized based on the prediction strength. (B) Antagonism of ligand-stimulated dopamine receptors by ONC201. (C) Schild analysis of DRD2L antagonism by ONC201 using arrestin recruitment or (D) cAMP modulation reporters.



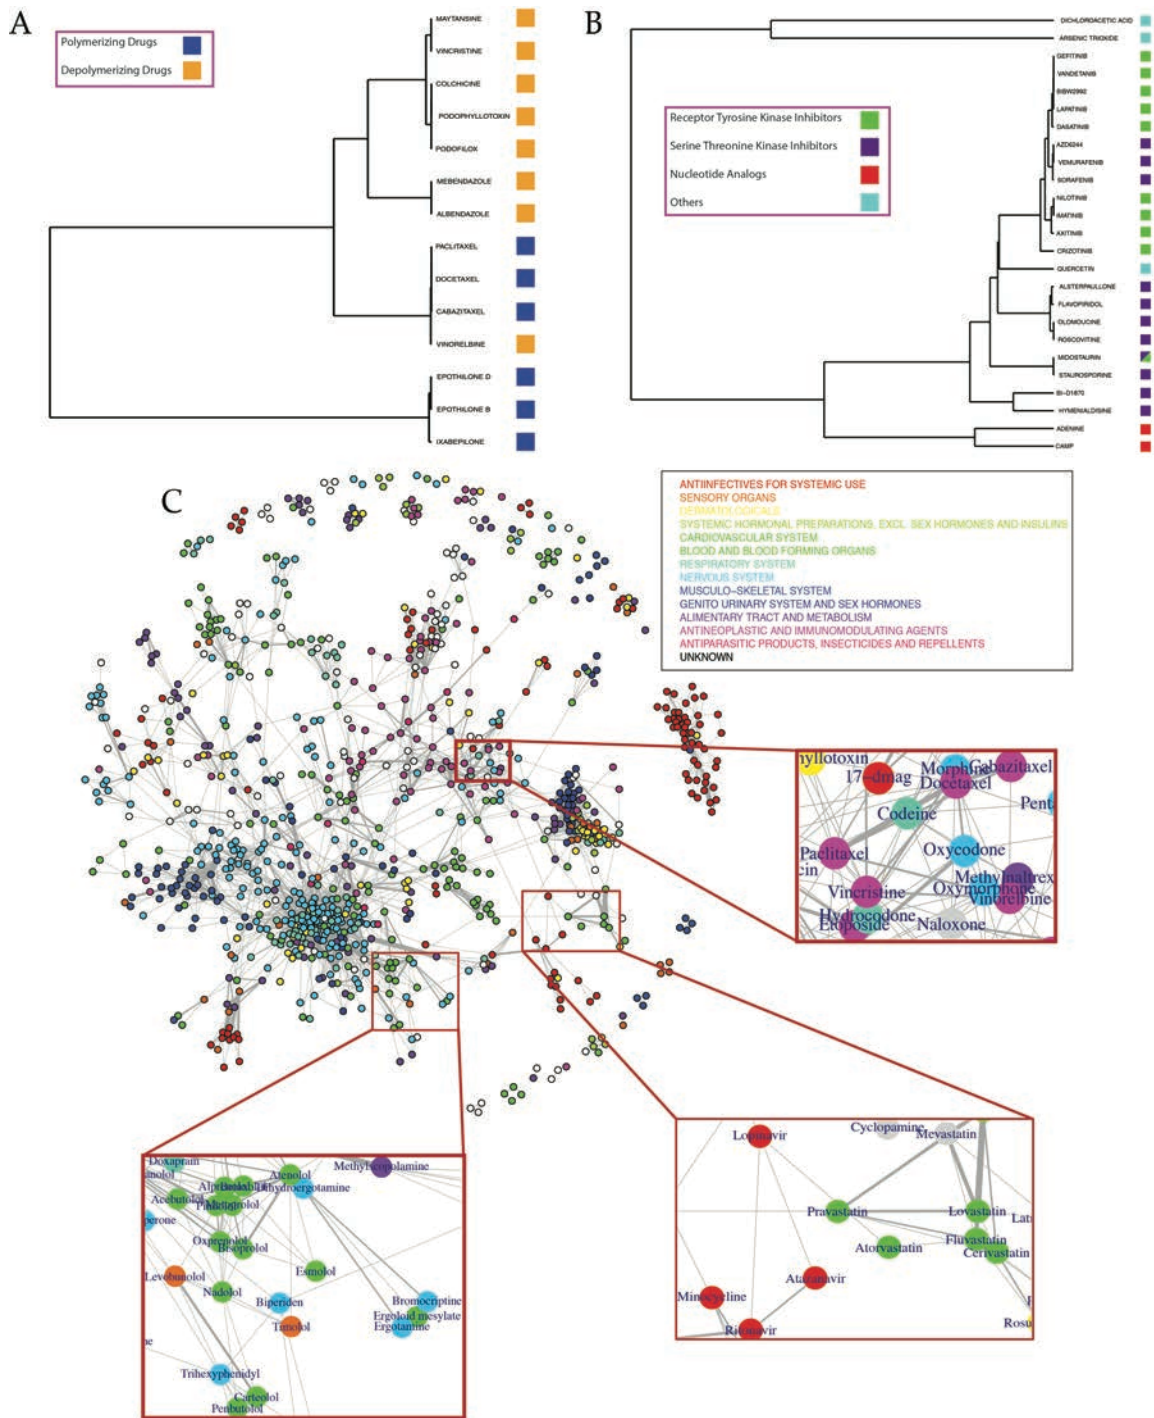

Figure 6

736  
737  
738  
739  
740  
741  
742

Figure 6: BANDIT can predict specific mechanisms of action and connections between drug classes – A) Hierarchical clustering of drugs known to target microtubules and B) drugs known to target protein kinases. C) Network of drugs based on shared target interactions. Drugs are colored based on their most prevalent ATC code. Three specific clusters corresponding to beta-blockers and Parkinson's medications, anti-retrovirals and statins, and opioids and anti-microtubule drugs are highlighted.

- 743 1 Cuatrecasas, P. Drug discovery in jeopardy. *The Journal of clinical*  
744 *investigation* **116**, 2837-2842, doi:10.1172/JCI29999 (2006).
- 745 2 Chan, J. N., Nislow, C. & Emili, A. Recent advances and method development  
746 for drug target identification. *Trends in pharmacological sciences* **31**, 82-88,  
747 doi:10.1016/j.tips.2009.11.002 (2010).
- 748 3 Weigelt, J. The case for open-access chemical biology. A strategy for pre-  
749 competitive medicinal chemistry to promote drug discovery. *EMBO reports*  
750 **10**, 941-945, doi:10.1038/embor.2009.193 (2009).
- 751 4 Williams, M. Target validation. *Current opinion in pharmacology* **3**, 571-577  
752 (2003).
- 753 5 Dearden, J. C. In silico prediction of drug toxicity. *Journal of computer-aided*  
754 *molecular design* **17**, 119-127 (2003).
- 755 6 Butina, D., Segall, M. D. & Frankcombe, K. Predicting ADME properties in  
756 silico: methods and models. *Drug Discov Today* **7**, S83-88 (2002).
- 757 7 Nantasenamat, C., Isarankura-Na-Ayudhya, C. & Prachayasittikul, V. Advances  
758 in computational methods to predict the biological activity of compounds.  
759 *Expert Opin Drug Discov* **5**, 633-654, doi:10.1517/17460441.2010.492827  
760 (2010).
- 761 8 Li, H. *et al.* TarFisDock: a web server for identifying drug targets with docking  
762 approach. *Nucleic acids research* **34**, W219-224, doi:10.1093/nar/gkl114  
763 (2006).
- 764 9 Rarey, M., Kramer, B., Lengauer, T. & Klebe, G. A fast flexible docking method  
765 using an incremental construction algorithm. *Journal of molecular biology*  
766 **261**, 470-489, doi:10.1006/jmbi.1996.0477 (1996).
- 767 10 Wang, K. *et al.* Prediction of drug-target interactions for drug repositioning  
768 only based on genomic expression similarity. *PLoS computational biology* **9**,  
769 e1003315, doi:10.1371/journal.pcbi.1003315 (2013).
- 770 11 Lamb, J. The Connectivity Map: a new tool for biomedical research. *Nature*  
771 *reviews. Cancer* **7**, 54-60, doi:10.1038/nrc2044 (2007).
- 772 12 Lamb, J. *et al.* The Connectivity Map: using gene-expression signatures to  
773 connect small molecules, genes, and disease. *Science* **313**, 1929-1935,  
774 doi:10.1126/science.1132939 (2006).
- 775 13 Campillos, M., Kuhn, M., Gavin, A. C., Jensen, L. J. & Bork, P. Drug target  
776 identification using side-effect similarity. *Science* **321**, 263-266,  
777 doi:10.1126/science.1158140 (2008).
- 778 14 Grundmark, B., Holmberg, L., Garmo, H. & Zethelius, B. Reducing the noise in  
779 signal detection of adverse drug reactions by standardizing the background:  
780 a pilot study on analyses of proportional reporting ratios-by-therapeutic  
781 area. *Eur J Clin Pharmacol* **70**, 627-635, doi:10.1007/s00228-014-1658-1  
782 (2014).
- 783 15 Shang, N., Xu, H., Rindfleisch, T. C. & Cohen, T. Identifying plausible adverse  
784 drug reactions using knowledge extracted from the literature. *J Biomed*  
785 *Inform* **52**, 293-310, doi:10.1016/j.jbi.2014.07.011 (2014).
- 786 16 Fortney, K. *et al.* Prioritizing therapeutics for lung cancer: an integrative  
787 meta-analysis of cancer gene signatures and chemogenomic data. *PLoS*

- 788 *computational biology* **11**, e1004068, doi:10.1371/journal.pcbi.1004068  
789 (2015).
- 790 17 Ma'ayan, A. *et al.* Lean Big Data integration in systems biology and systems  
791 pharmacology. *Trends in pharmacological sciences* **35**, 450-460,  
792 doi:10.1016/j.tips.2014.07.001 (2014).
- 793 18 Wang, Z., Clark, N. R. & Ma'ayan, A. Drug-induced adverse events prediction  
794 with the LINCS L1000 data. *Bioinformatics* **32**, 2338-2345,  
795 doi:10.1093/bioinformatics/btw168 (2016).
- 796 19 Perlman, L., Gottlieb, A., Atias, N., Ruppim, E. & Sharan, R. Combining drug and  
797 gene similarity measures for drug-target elucidation. *Journal of*  
798 *computational biology : a journal of computational molecular cell biology* **18**,  
799 133-145, doi:10.1089/cmb.2010.0213 (2011).
- 800 20 Fakhraei, S., Huang, B., Raschid, L. & Getoor, L. Network-Based Drug-Target  
801 Interaction Prediction with Probabilistic Soft Logic. *IEEE/ACM transactions*  
802 *on computational biology and bioinformatics / IEEE, ACM* **11**, 775-787,  
803 doi:10.1109/TCBB.2014.2325031 (2014).
- 804 21 Chen, X. *et al.* Drug-target interaction prediction: databases, web servers and  
805 computational models. *Brief Bioinform* **17**, 696-712,  
806 doi:10.1093/bib/bbv066 (2016).
- 807 22 Shoemaker, R. H. The NCI60 human tumour cell line anticancer drug screen.  
808 *Nature reviews. Cancer* **6**, 813-823, doi:10.1038/nrc1951 (2006).
- 809 23 Li, Q., Cheng, T., Wang, Y. & Bryant, S. H. PubChem as a public resource for  
810 drug discovery. *Drug Discov Today* **15**, 1052-1057,  
811 doi:10.1016/j.drudis.2010.10.003 (2010).
- 812 24 Chen, B. & Wild, D. J. PubChem BioAssays as a data source for predictive  
813 models. *Journal of molecular graphics & modelling* **28**, 420-426,  
814 doi:10.1016/j.jmgm.2009.10.001 (2010).
- 815 25 Kuhn, M., Campillos, M., Letunic, I., Jensen, L. J. & Bork, P. A side effect  
816 resource to capture phenotypic effects of drugs. *Molecular systems biology* **6**,  
817 343, doi:10.1038/msb.2009.98 (2010).
- 818 26 Law, V. *et al.* DrugBank 4.0: shedding new light on drug metabolism. *Nucleic*  
819 *Acids Res* **42**, D1091-1097, doi:10.1093/nar/gkt1068 (2014).
- 820 27 Wishart, D. S. *et al.* DrugBank: a knowledgebase for drugs, drug actions and  
821 drug targets. *Nucleic acids research* **36**, D901-906, doi:10.1093/nar/gkm958  
822 (2008).
- 823 28 Yamanishi, Y., Kotera, M., Kanehisa, M. & Goto, S. Drug-target interaction  
824 prediction from chemical, genomic and pharmacological data in an integrated  
825 framework. *Bioinformatics* **26**, i246-254, doi:10.1093/bioinformatics/btq176  
826 (2010).
- 827 29 Hizukuri, Y., Sawada, R. & Yamanishi, Y. Predicting target proteins for drug  
828 candidate compounds based on drug-induced gene expression data in a  
829 chemical structure-independent manner. *BMC Med Genomics* **8**, 82,  
830 doi:10.1186/s12920-015-0158-1 (2015).
- 831 30 Anastassiadis, T., Deacon, S. W., Devarajan, K., Ma, H. & Peterson, J. R.  
832 Comprehensive assay of kinase catalytic activity reveals features of kinase

- 833 inhibitor selectivity. *Nat Biotechnol* **29**, 1039-1045, doi:10.1038/nbt.2017  
834 (2011).
- 835 31 Jordan, M. A. & Wilson, L. Microtubules as a target for anticancer drugs.  
836 *Nature reviews. Cancer* **4**, 253-265 (2004).
- 837 32 Jordan, M. A. & Wilson, L. Microtubules and actin filaments: dynamic targets  
838 for cancer chemotherapy. *Curr Opin Cell Biol* **10**, 123-130 (1998).
- 839 33 Giannakakou, P., Sackett, D. & Fojo, T. Tubulin/microtubules: still a promising  
840 target for new chemotherapeutic agents. *J Natl Cancer Inst* **92**, 182-183  
841 (2000).
- 842 34 Jordan, A., Hadfield, J. A., Lawrence, N. J. & McGown, A. T. Tubulin as a target  
843 for anticancer drugs: Agents which interact with the mitotic spindle.  
844 *Medicinal Research Reviews* **18**, 259-296, doi:10.1002/(SICI)1098-  
845 1128(199807)18:4<259::AID-MED3>3.0.CO;2-U (1998).
- 846 35 Mukhtar, E., Adhami, V. M. & Mukhtar, H. Targeting microtubules by natural  
847 agents for cancer therapy. *Molecular cancer therapeutics* **13**, 275-284,  
848 doi:10.1158/1535-7163.MCT-13-0791 (2014).
- 849 36 Giannakakou, P. *et al.* Paclitaxel-resistant human ovarian cancer cells have  
850 mutant beta-tubulins that exhibit impaired paclitaxel-driven polymerization.  
851 *The Journal of biological chemistry* **272**, 17118-17125 (1997).
- 852 37 Nicolaou, K. C. *et al.* Synthesis of epothilones A and B in solid and solution  
853 phase. *Nature* **387**, 268-272, doi:10.1038/387268a0 (1997).
- 854 38 Giannakakou, P. *et al.* A common pharmacophore for epothilone and taxanes:  
855 molecular basis for drug resistance conferred by tubulin mutations in human  
856 cancer cells. *Proceedings of the National Academy of Sciences of the United*  
857 *States of America* **97**, 2904-2909, doi:10.1073/pnas.040546297 (2000).
- 858 39 Nicolaou, K. C. *et al.* Chemical synthesis and biological evaluation of cis- and  
859 trans-12,13-cyclopropyl and 12,13-cyclobutyl epothilones and related  
860 pyridine side chain analogues. *J Am Chem Soc* **123**, 9313-9323 (2001).
- 861 40 Nicolaou, K. C. *et al.* Design, synthesis, and biological properties of highly  
862 potent epothilone B analogues. *Angew Chem Int Ed Engl* **42**, 3515-3520,  
863 doi:10.1002/anie.200351819 (2003).
- 864 41 O'Rourke, B., Yang, C. P., Sharp, D. & Horwitz, S. B. Eribulin disrupts EB1-  
865 microtubule plus-tip complex formation. *Cell Cycle* **13**, 3218-3221,  
866 doi:10.4161/15384101.2014.950143 (2014).
- 867 42 Dybdal-Hargreaves, N. F., Risinger, A. L. & Mooberry, S. L. Eribulin mesylate:  
868 mechanism of action of a unique microtubule-targeting agent. *Clin Cancer Res*  
869 **21**, 2445-2452, doi:10.1158/1078-0432.CCR-14-3252 (2015).
- 870 43 Gamucci, T. *et al.* Eribulin mesylate in pretreated breast cancer patients: a  
871 multicenter retrospective observational study. *J Cancer* **5**, 320-327,  
872 doi:10.7150/jca.8748 (2014).
- 873 44 Allen, J. E. *et al.* Dual Inactivation of Akt and ERK by TIC10 Signals Foxo3a  
874 Nuclear Translocation, TRAIL Gene Induction, and Potent Antitumor Effects.  
875 *Science translational medicine* **5**, 171ra117-171ra117,  
876 doi:10.1126/scitranslmed.3004828 (2013).



- 877 45 J. Ishizawa *et al.* ONC201 Induces p53-independent Apoptosis in  
878 Hematological Malignancies and Leukemic Stem/Progenitor Cells through ER  
879 Stress Response. *Science Signaling* (2015 (in press)).
- 880 46 Kline CL *et al.* Anti-cancer agent ONC201 activates early ATF4/DR5  
881 upregulation, and cell death associated with XIAP inhibition. *Science*  
882 *Signaling* (2015 (in press)).
- 883 47 Bedard, P., Parkes, J. D. & Marsden, C. D. Effect of new dopamine-blocking  
884 agent (oxiperomide) on drug-induced dyskinesias in Parkinson's disease and  
885 spontaneous dyskinesias. *Br Med J* **1**, 954-956 (1978).
- 886 48 Casey, D. E. & Gerlach, J. Oxiperomide in tardive dyskinesia. *J Neurol*  
887 *Neurosurg Psychiatry* **43**, 264-267 (1980).
- 888 49 Casey, D. E. & Gerlach, J. Sulpiride and oxiperomide in tardive dyskinesia.  
889 *Trans Am Neurol Assoc* **104**, 210-211 (1979).
- 890 50 Meltzer, H. Y., Sachar, E. J. & Frantz, A. G. Dopamine antagonism by  
891 thioridazine in schizophrenia. *Biol Psychiatry* **10**, 53-57 (1975).
- 892 51 Zhang, R. & Xie, X. Tools for GPCR drug discovery. *Acta Pharmacol Sin* **33**,  
893 372-384, doi:10.1038/aps.2011.173 (2012).
- 894 52 Wagner, J. *et al.* The angular structure of ONC201, a TRAIL pathway-inducing  
895 compound, determines its potent anti-cancer activity. *Oncotarget* **5**, 12728-  
896 12737 (2014).
- 897 53 Chang, J. Y. *et al.* Dual inhibition of topoisomerase I and tubulin  
898 polymerization by BPR0Y007, a novel cytotoxic agent. *Biochem Pharmacol*  
899 **65**, 2009-2019 (2003).
- 900 54 Devillard, L. *et al.* Opioid-induced protection of cardiac myocytes from  
901 ischemic injury: Involvement of microtubules. *Journal of Molecular and*  
902 *Cellular Cardiology* **42**, S193-S194, doi:10.1016/j.yjmcc.2007.03.588.
- 903 55 Borsodi, A. & Toth, G. Microtubule disassembly increases the number of  
904 opioid receptor binding sites in rat cerebrum membranes. *Neuropeptides* **8**,  
905 51-54 (1986).
- 906 56 Crosby, N. J., Deane, K. H. & Clarke, C. E. Beta-blocker therapy for tremor in  
907 Parkinson's disease. *Cochrane Database Syst Rev*, CD003361,  
908 doi:10.1002/14651858.CD003361 (2003).
- 909 57 Carr, A. & Cooper, D. A. Adverse effects of antiretroviral therapy. *Lancet* **356**,  
910 1423-1430, doi:10.1016/S0140-6736(00)02854-3 (2000).
- 911 58 Carhart, R. E., Smith, D. H. & Venkataraghavan, R. Atom pairs as molecular  
912 features in structure-activity studies: definition and applications. *Journal of*  
913 *Chemical Information and Computer Sciences* **25**, 64-73,  
914 doi:10.1021/ci00046a002 (1985).
- 915 59 Anastassiadis, T., Deacon, S. W., Devarajan, K., Ma, H. & Peterson, J. R.  
916 Comprehensive assay of kinase catalytic activity reveals features of kinase  
917 inhibitor selectivity. *Nat Biotech* **29**, 1039-1045,  
918 doi:<http://www.nature.com/nbt/journal/v29/n11/abs/nbt.2017.html>  
919 [-supplementary-information](#) (2011).
- 920 60 McGuinness, D. *et al.* Characterizing Cannabinoid CB 2 Receptor Ligands  
921 Using DiscoverX PathHunter™  $\beta$ -Arrestin Assay. *Journal of Biomolecular*  
922 *Screening* **14**, 49-58, doi:10.1177/1087057108327329 (2009).



- 923 61 Patel, A. *et al.* A combination of ultrahigh throughput PathHunter and  
924 cytokine secretion assays to identify glucocorticoid receptor agonists. *Anal*  
925 *Biochem* **385**, 286-292, doi:10.1016/j.ab.2008.11.005 (2009).
- 926 62 Corp, R. B. *Reaction Biology Corp Kinase Assay Protocol*,  
927 <[http://www.reactionbiology.com/webapps/site/Kinase\\_Assay\\_Protocol.as](http://www.reactionbiology.com/webapps/site/Kinase_Assay_Protocol.aspx)  
928 [px](http://www.reactionbiology.com/webapps/site/Kinase_Assay_Protocol.aspx)> (2017).
- 929 63 DiscoverX. *PathHunter Nuclear Translocation Assays*,  
930 <[https://www.discoverx.com/technologies-platforms/enzyme-fragment-](https://www.discoverx.com/technologies-platforms/enzyme-fragment-complementation-technology/cell-based-efc-assays/protein-translocation/nuclear-translocation-assays)  
931 [complementation-technology/cell-based-efc-assays/protein-](https://www.discoverx.com/technologies-platforms/enzyme-fragment-complementation-technology/cell-based-efc-assays/protein-translocation/nuclear-translocation-assays)  
932 [translocation/nuclear-translocation-assays](https://www.discoverx.com/technologies-platforms/enzyme-fragment-complementation-technology/cell-based-efc-assays/protein-translocation/nuclear-translocation-assays)> (2017).
- 933 64 Kanehisa, M. & Goto, S. KEGG: Kyoto Encyclopedia of Genes and Genomes.  
934 *Nucleic acids research* **28**, 27-30, doi:DOI 10.1093/nar/28.1.27 (2000).  
935
